# Supplementary material
Source: publisher site journal article supplement (https://www.spandidos-publications.com/6269/downloadSupplementary)
Supplement: Supplementary file 1 [file downloadSupplementary]

## Sheet: Sheet1
Table SII. Definition of terms in Fig. 4A.
Abbreviation	Definition
APC_co_inhibition	Antigen presenting cell co inhibition
APC_co_stimulation	Antigen presenting cell co stimulation
CCR	CC chemokine receptor
Check-point	Checkpoints
Cytolytic_activity	Cell lysis activity
HLA	Human leukocyte antigen
Inflammation-promoting	Pro-inflammatory
MHC_class_I	Main histocompatibility complex class I molecules
Parainflammation	Parainflammation
T_cell_co-inhibition	T cell co inhibition
T_cell_co-stimulation	T-cell co stimulation
Type_I_IFN_Reponse	Type I interferon
Type_II_IFN_Reponse	Type II interferon
aDCs	Activated dendritic cells
B_cells	B cells
DCs	dendritic cell
iDCs	immature dendritic cell
Macrophages	macrophage
Mast_cells	mast cells
Neutrophils	Neutrophils
NK_cells	Natural killer cells
pDCs	Plasma like dendritic cells
T_helper_cells	Helper T cells
Tfh	Follicular helper T cells
Th1_cells	Th1 helper cells
Th2_cells	Th2 helper cells
TIL	Tumor infiltrating lymphocytes
Treg	T regulatory cells
